# Supplementary material
Source: publisher site journal article supplement (https://spandidos-publications.com/3793/downloadSupplementary)

Figure S1. Immunofluorescence images of MAP2 (green) and DAPI (blue) in primary mouse cortical neurons on day 8 after plating. BF, bright field.

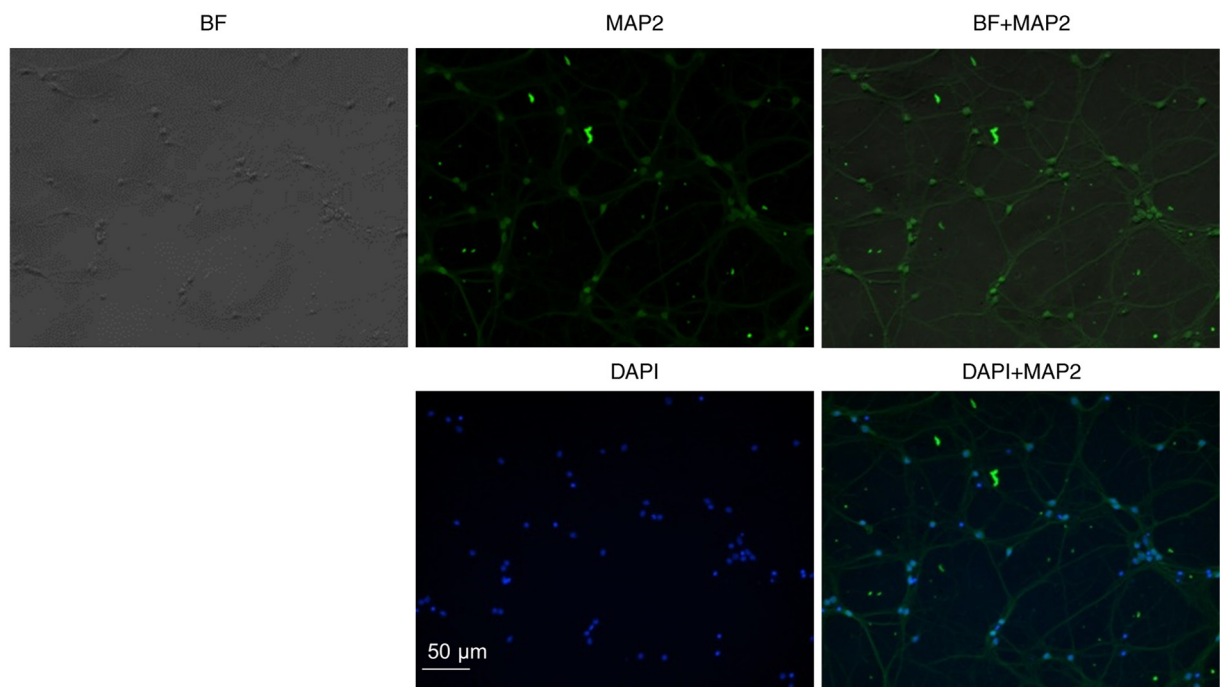

Supplement: Supplementary file 1 [file downloadSupplementary]
